# Supplementary material for: Highly sensitive fluorescent aptasensor for Salmonella paratyphi A via DNase I-mediated cyclic signal amplification
Source: Royal Society of Chemistry journal article supplement (doi:10.1039/c5ay02298c), 2015-01-01
Supplement: c5ay02298c1.pdf [file c5ay02298c1.pdf]

Supplement Information:

A

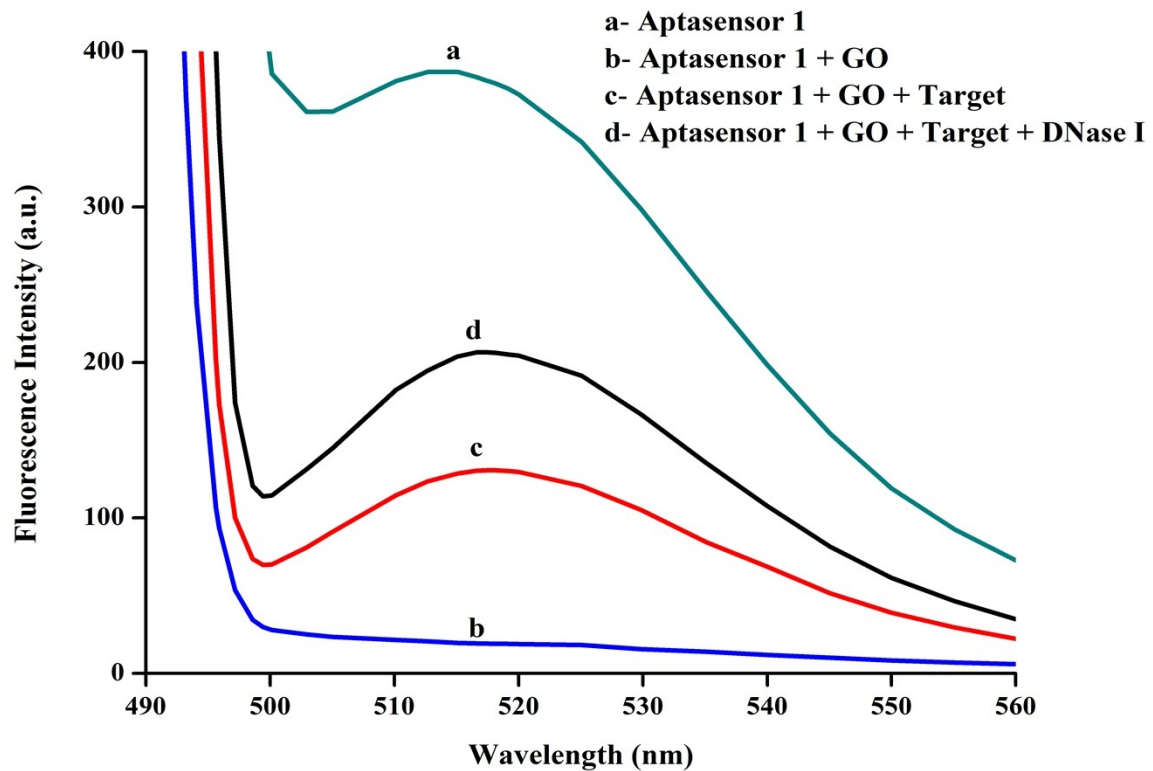

**B**

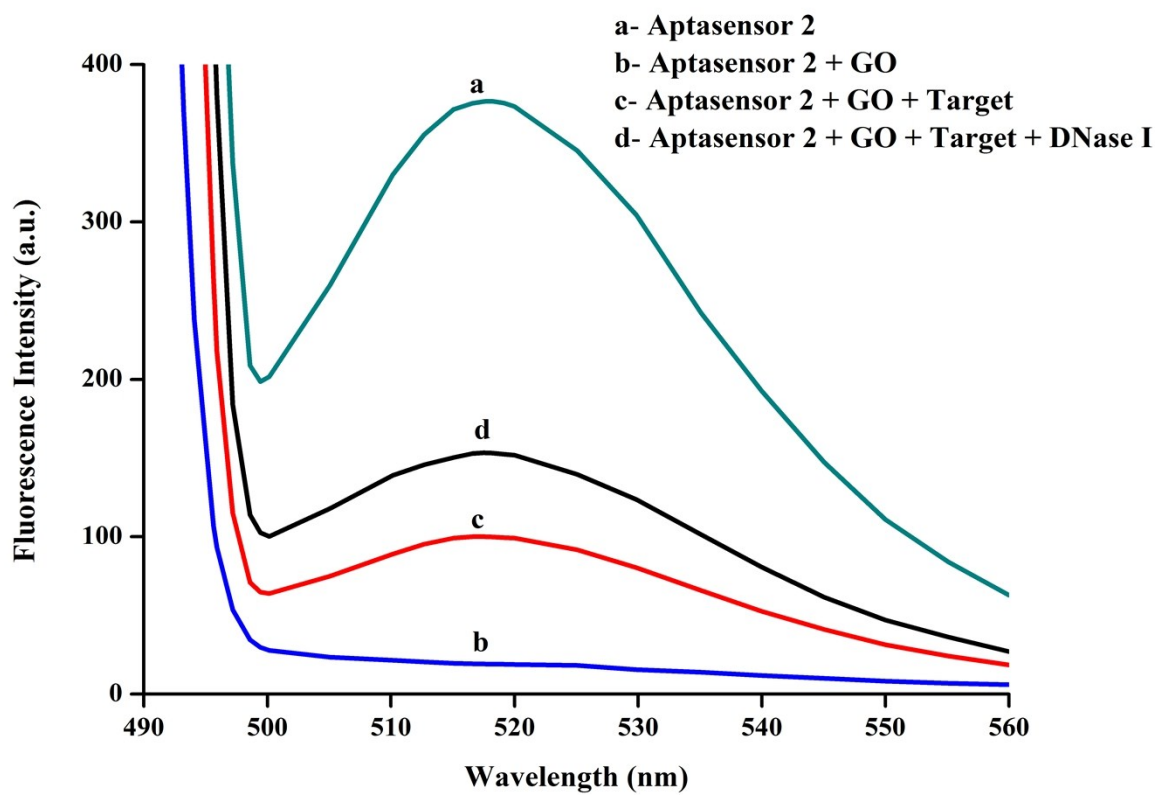

C

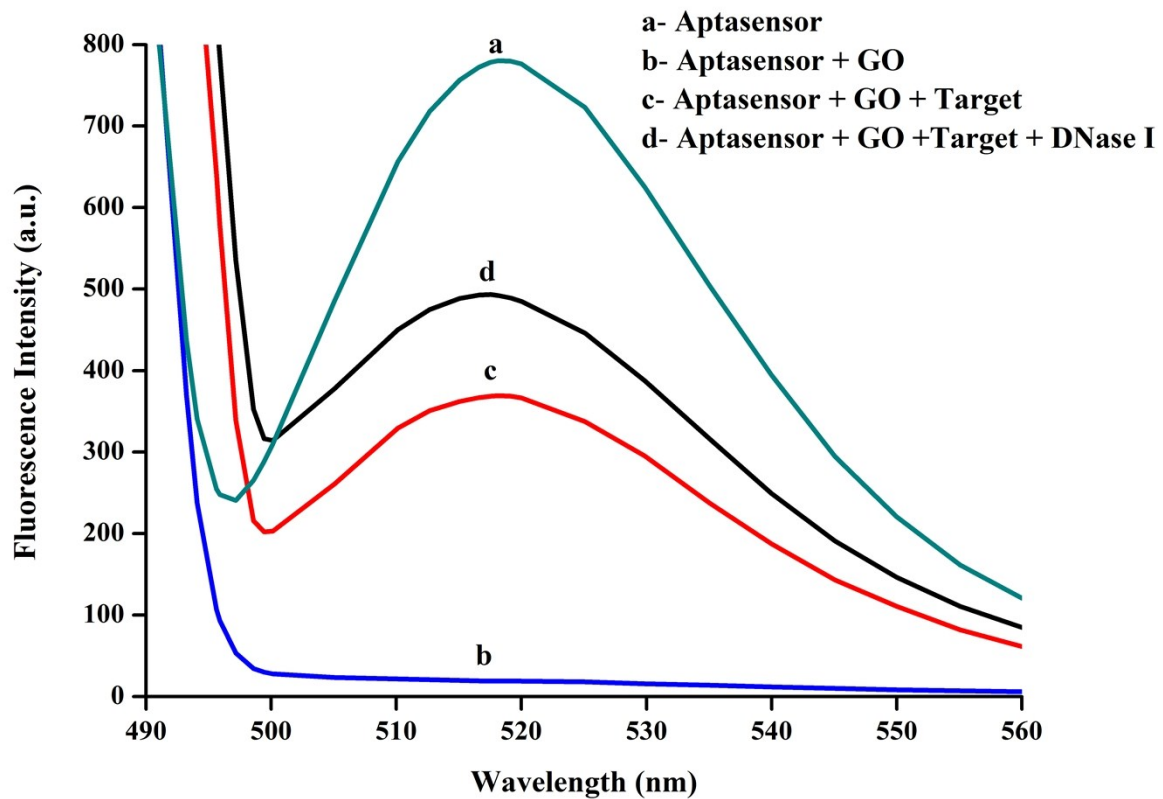

Figure 1S.

**Figure 1S:** The fluorescent comparison of the proposed aptasensors. (A) (B). (C) corresponded to the feasibility of the aptasensor 1, the aptasensor 2 and the aptasensor. Fluorescence intensities obtained from the following stages: the initial fluorescence intensity of the aptasensors (curve a); aptasensors/GO complex (curve b); aptasensors/GO complex + target (curve c); aptasensors/GO complex + target + DNase I (curve d). The aptasensor components: 25nM DA, 25nM probe 1, 25nM probe 2. The aptasensor 1 components: 25nM DA, 25nM probe 1. The aptasensor 2 components: 25nM DA, 25nM probe 2. GO concentration: 60 $\mu$ g/mL. Target concentration:  $1 \times 10^{11}$  cells/mL. DNase I concentration: 1U.  $\lambda_{em} = 517$ nm and  $\lambda_{ex} = 480$ nm.
